# Supplementary material
Source: PubMed Central journal article supplement (PMC4810802)

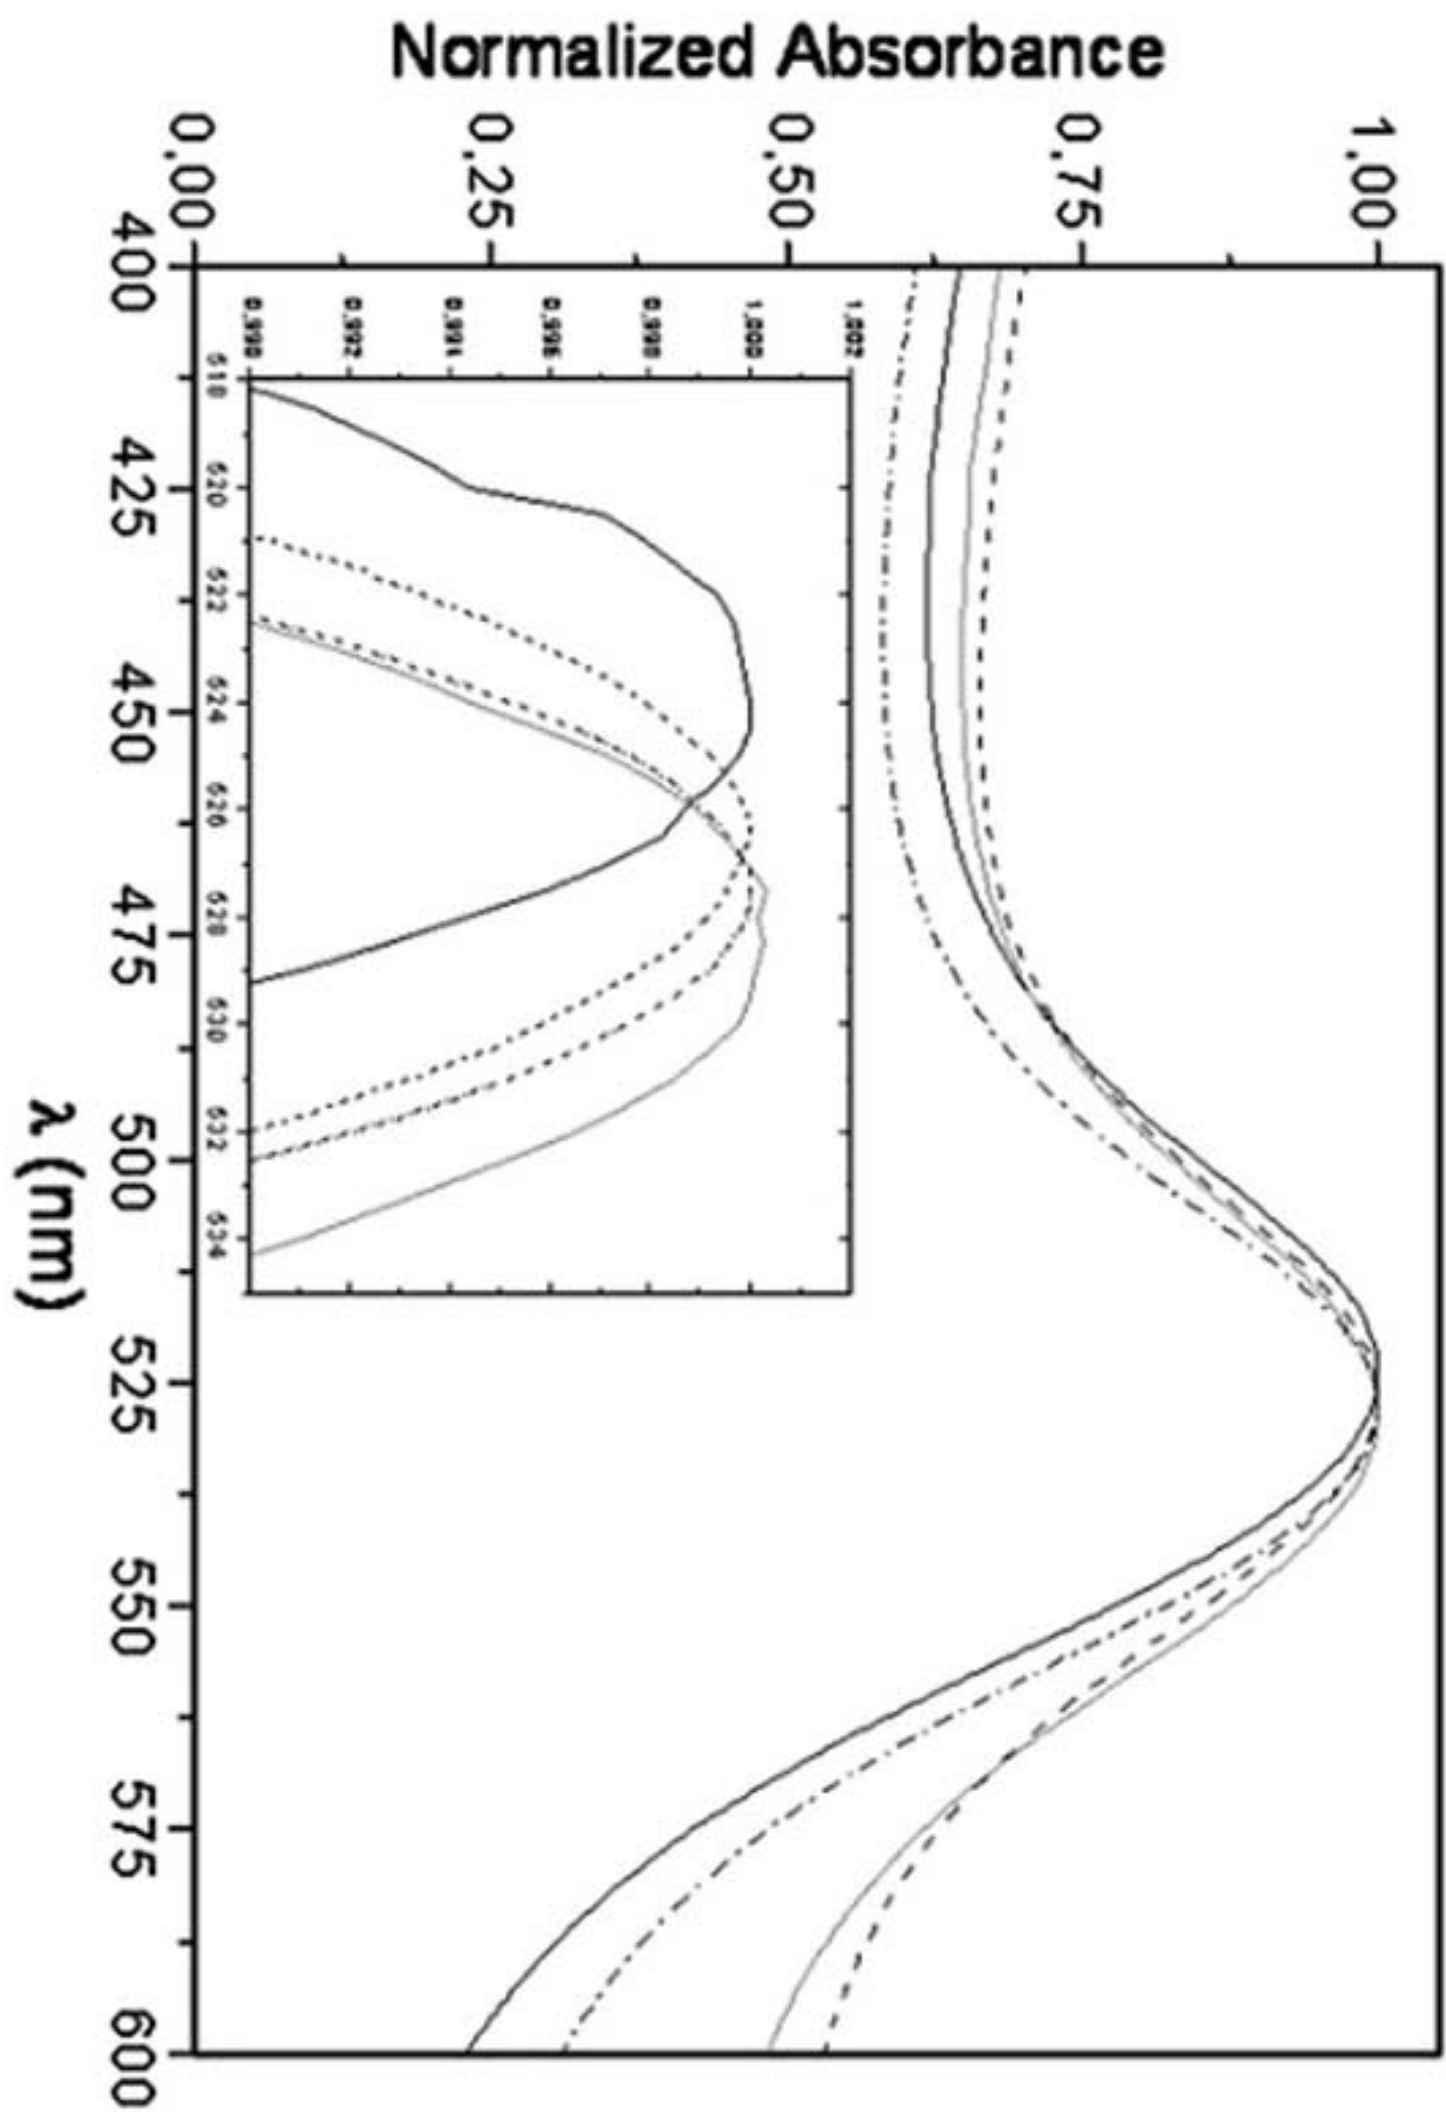

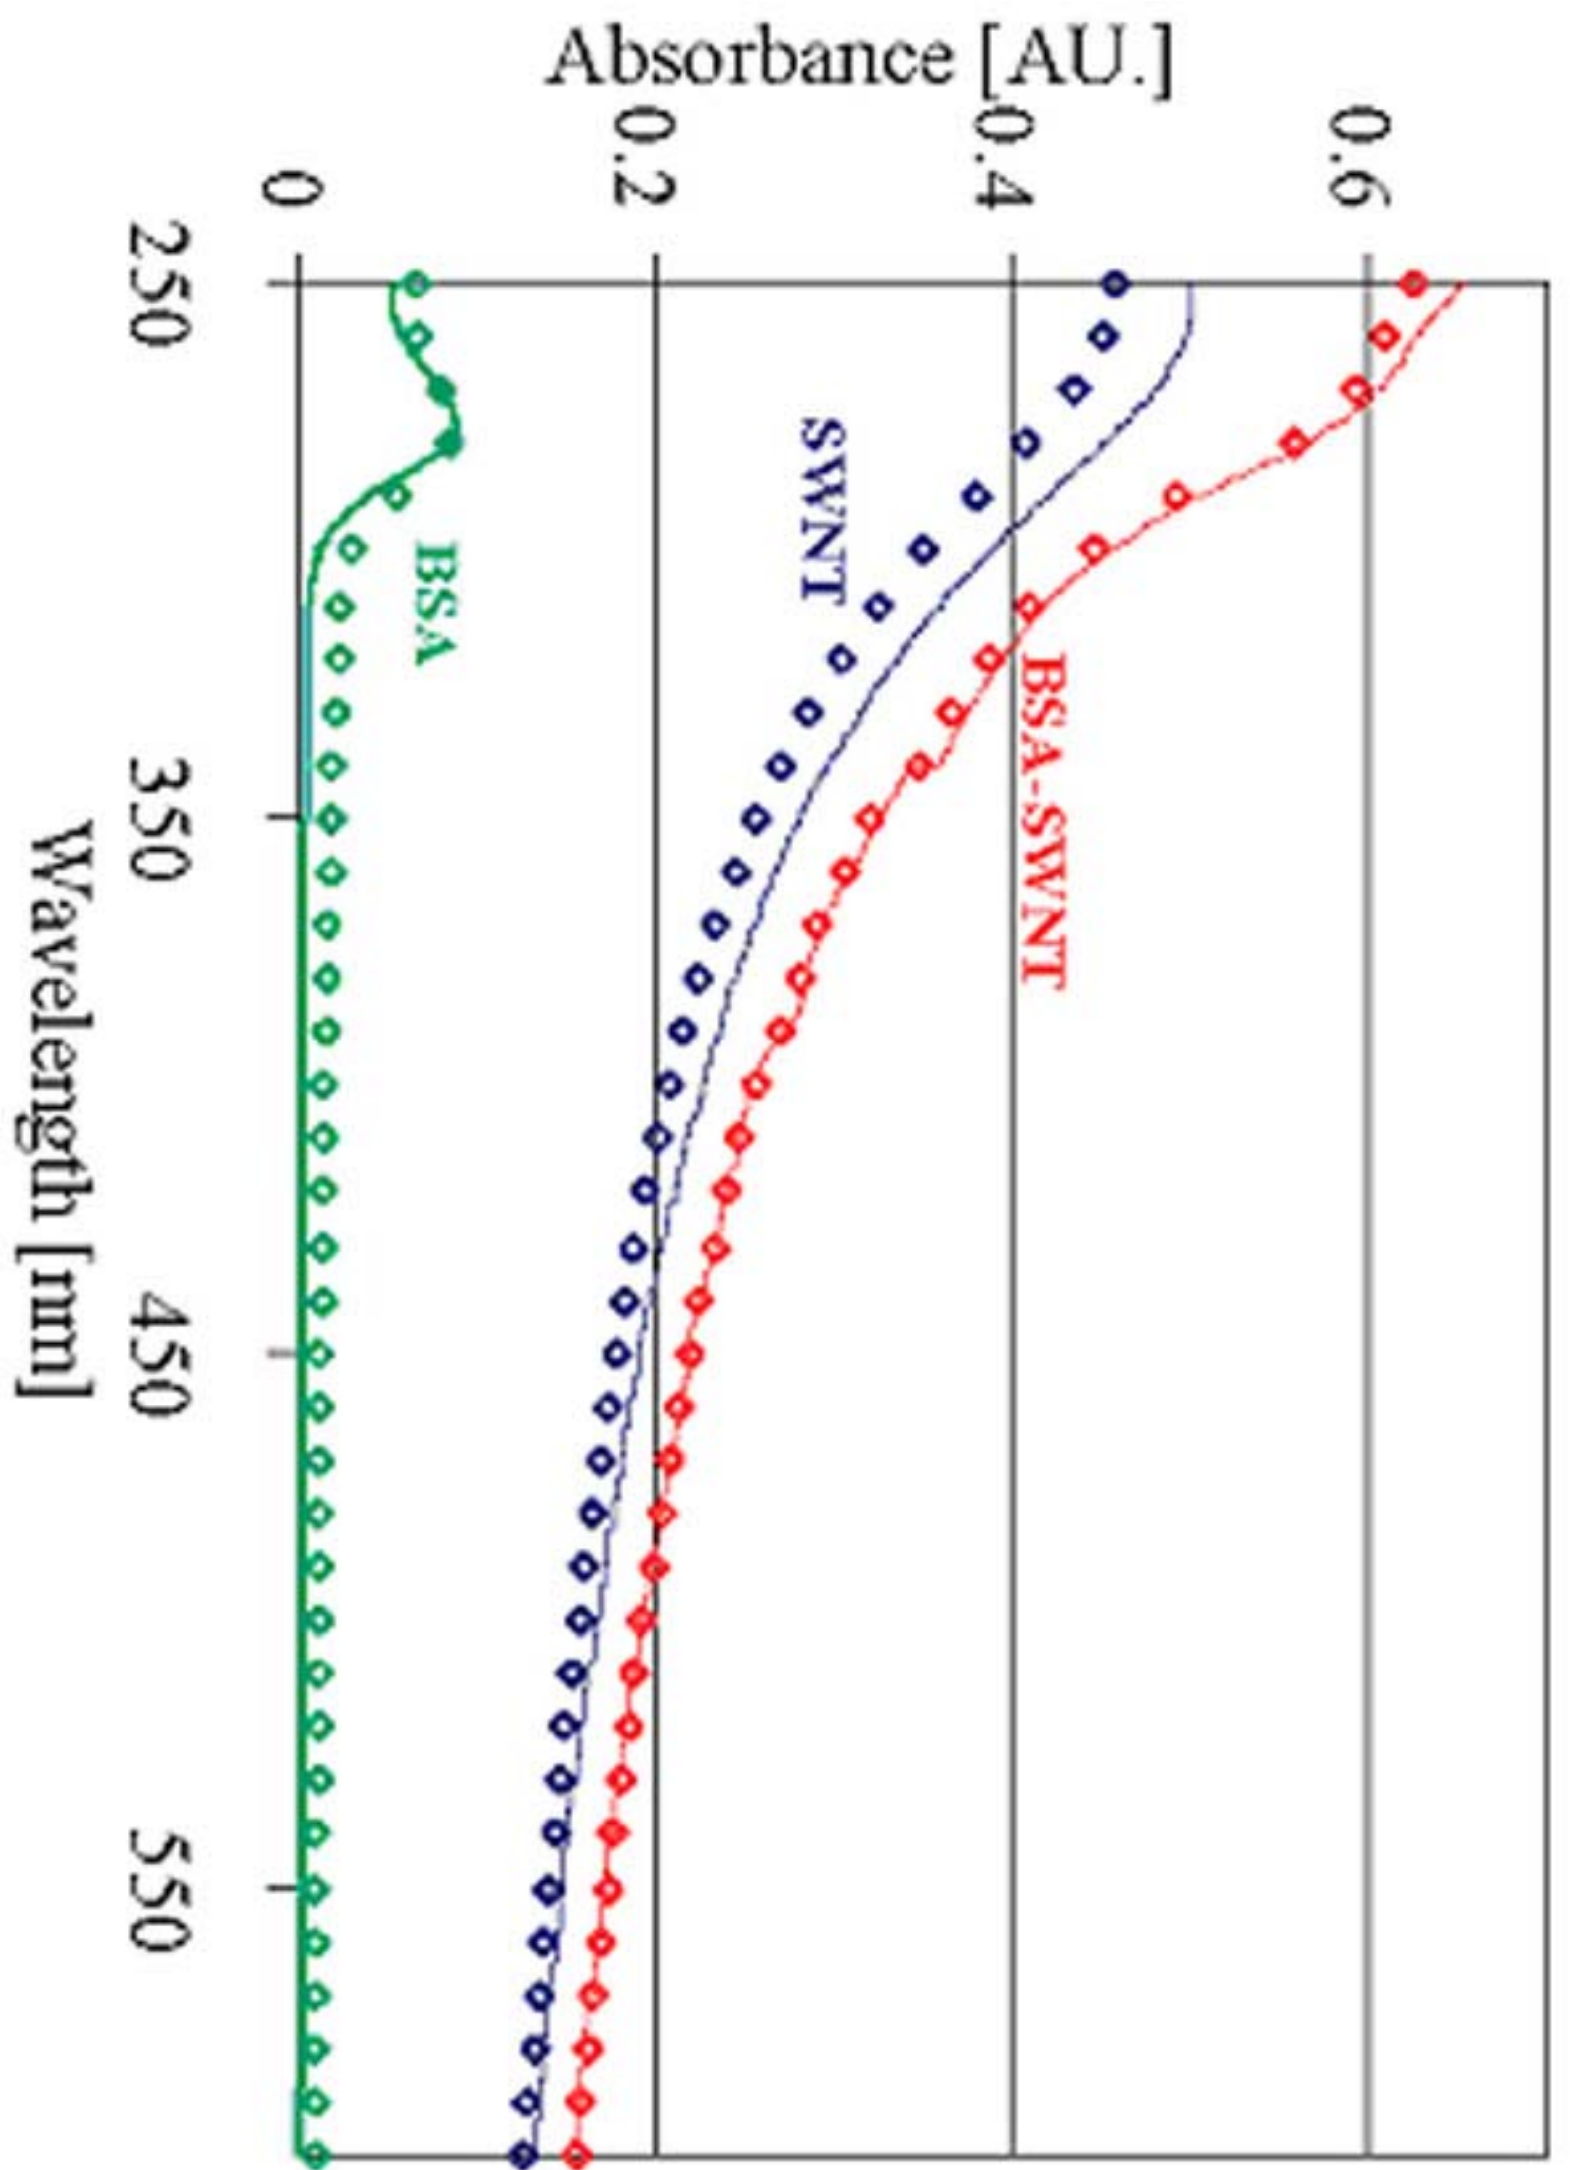

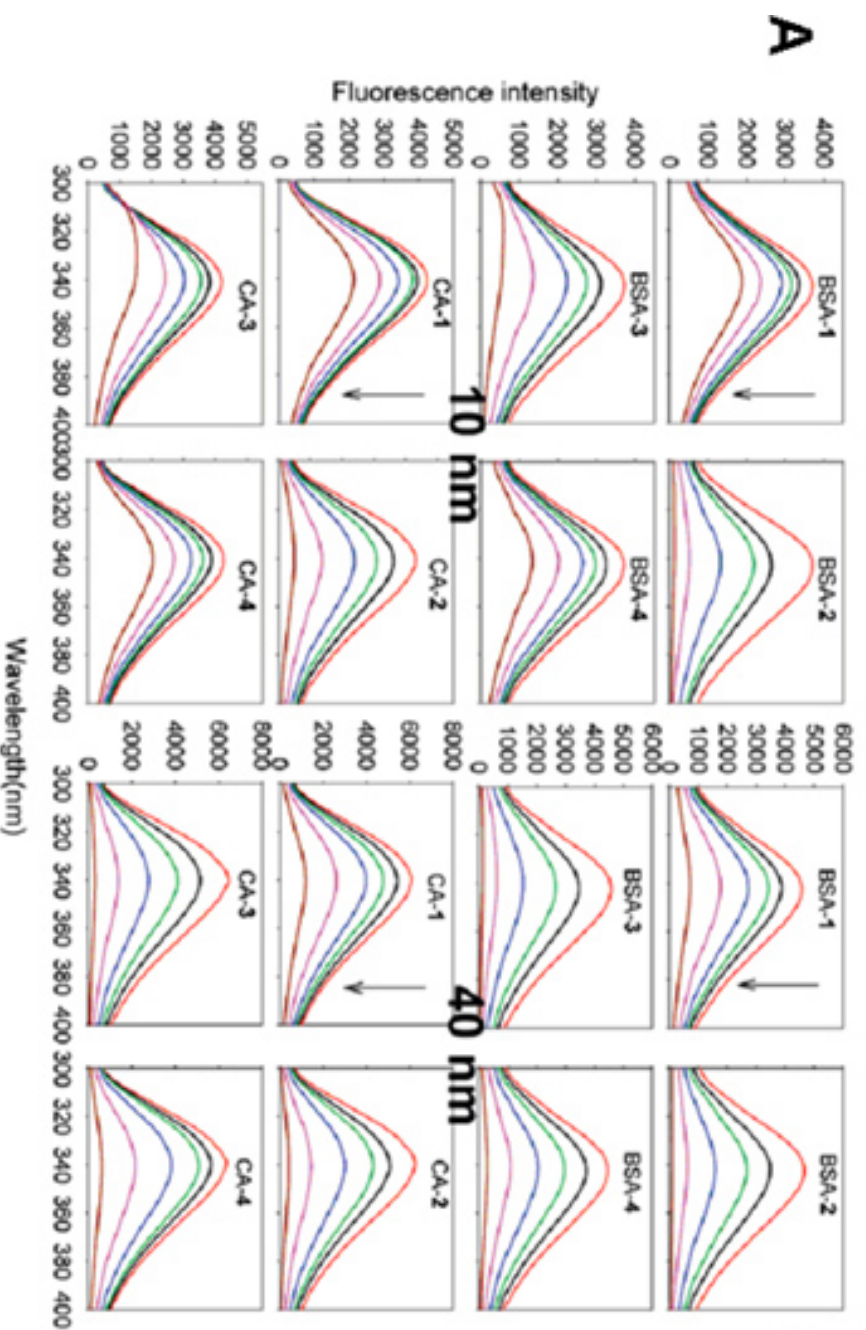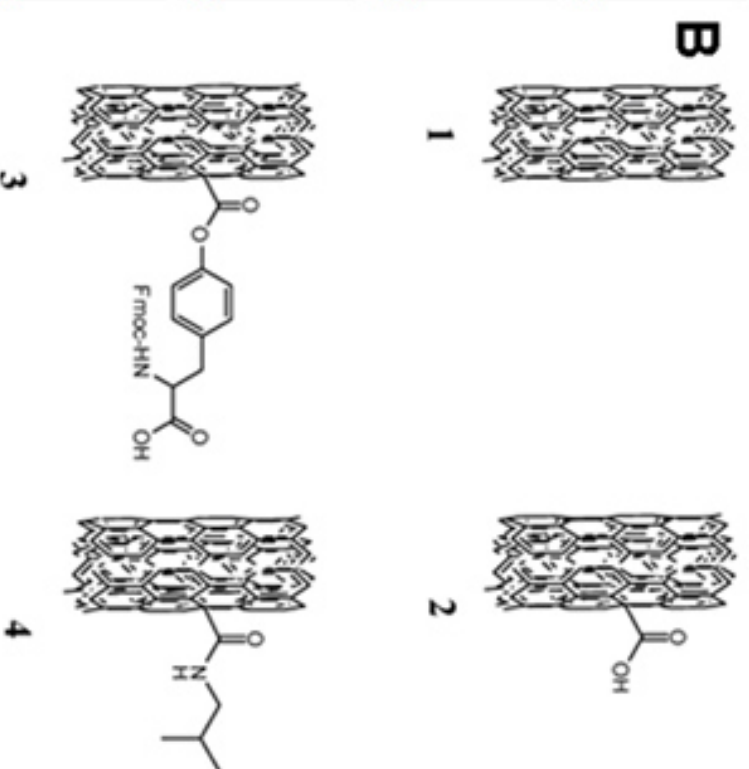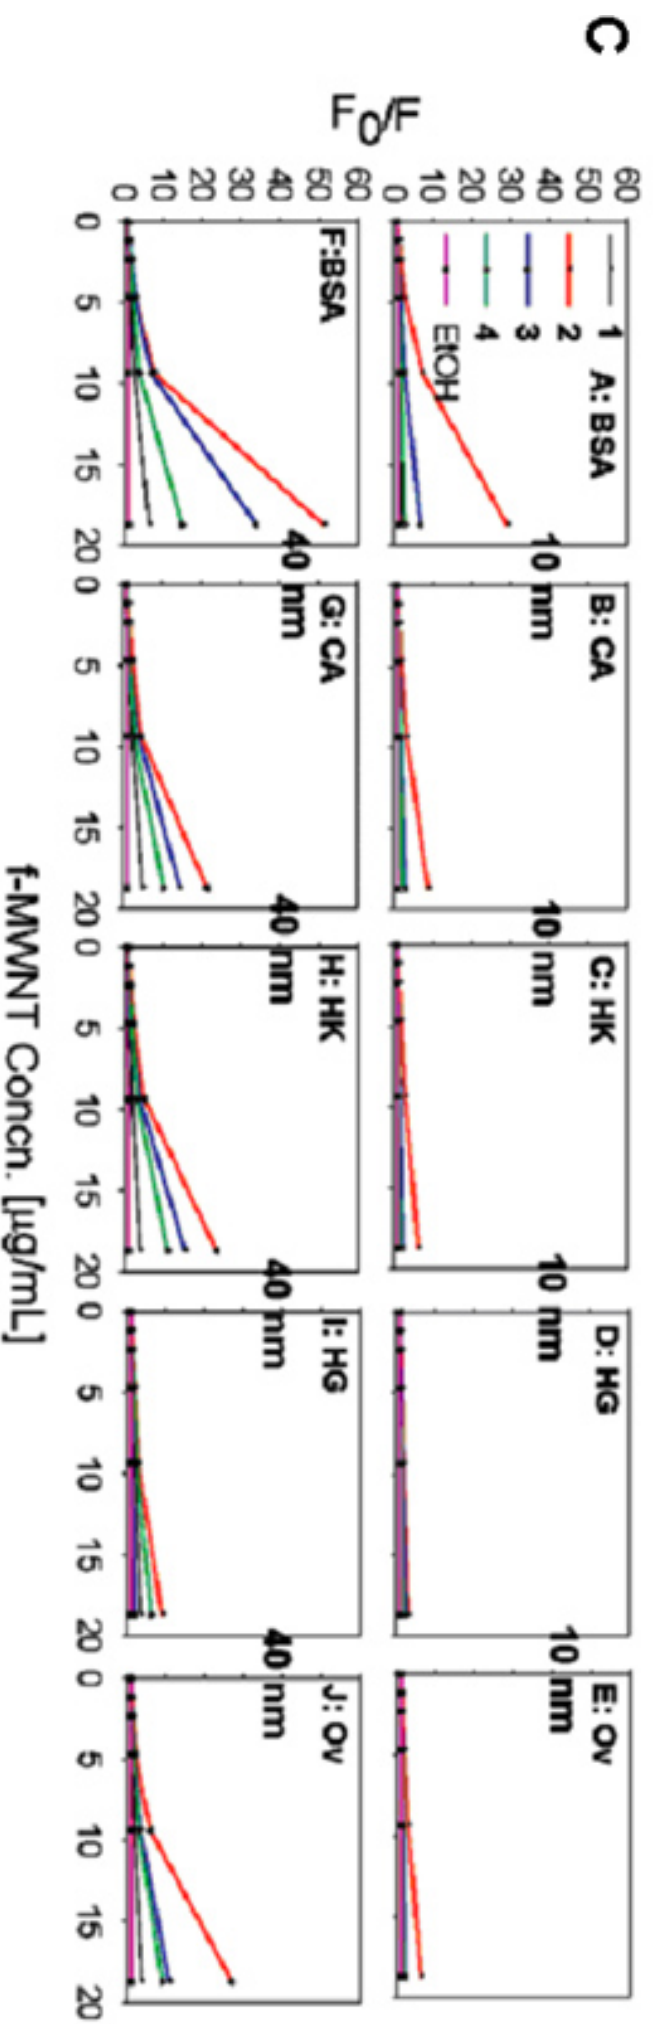

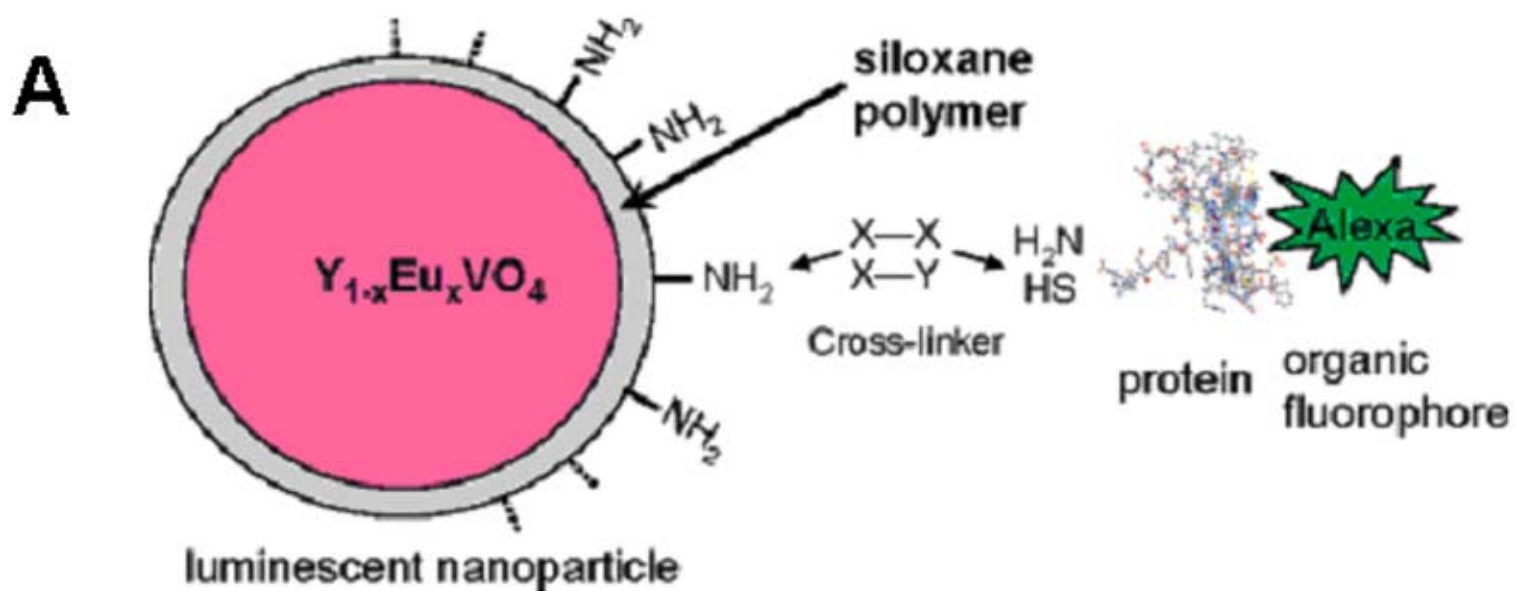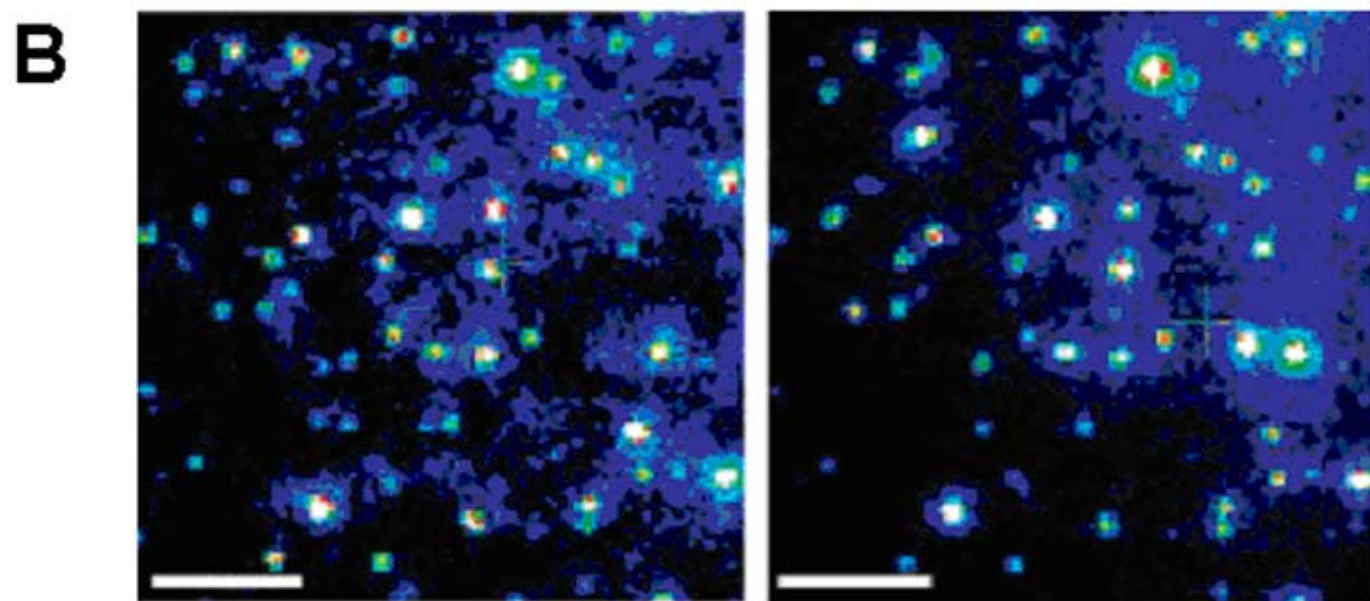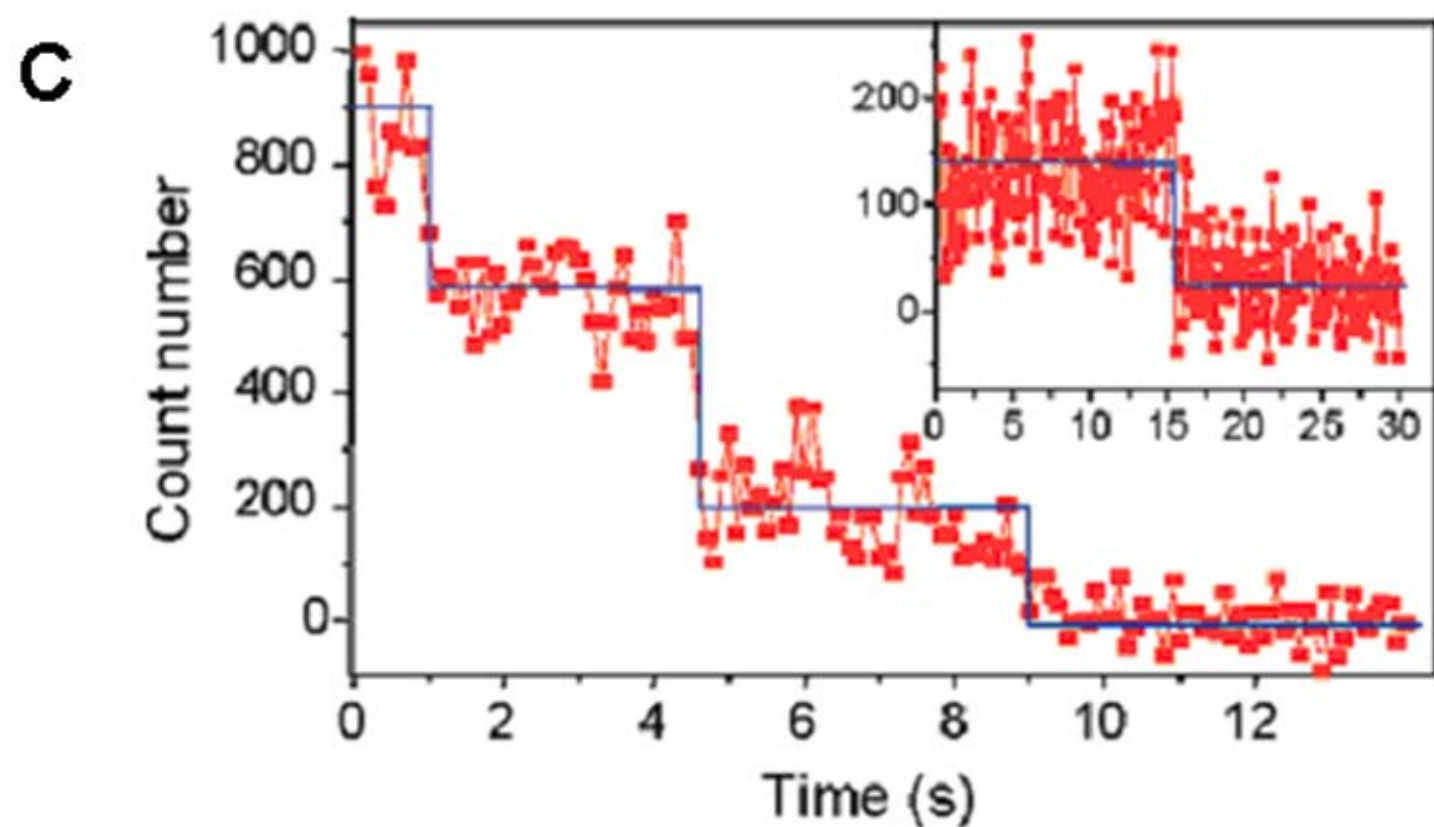

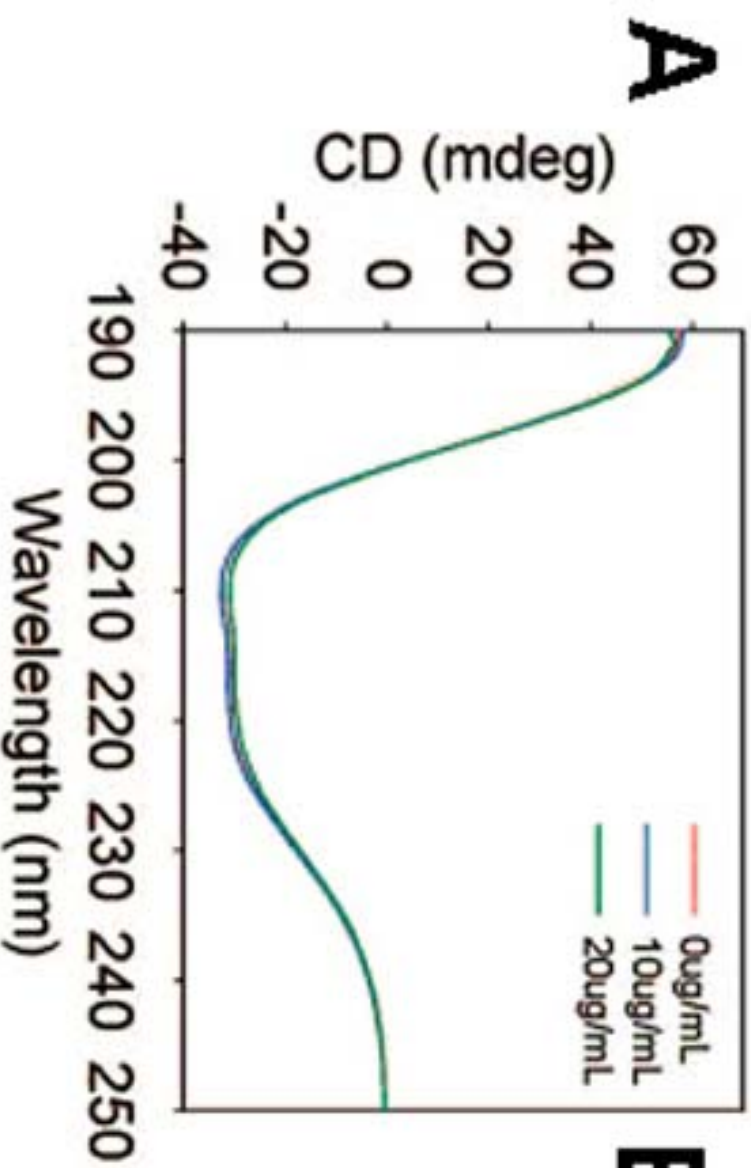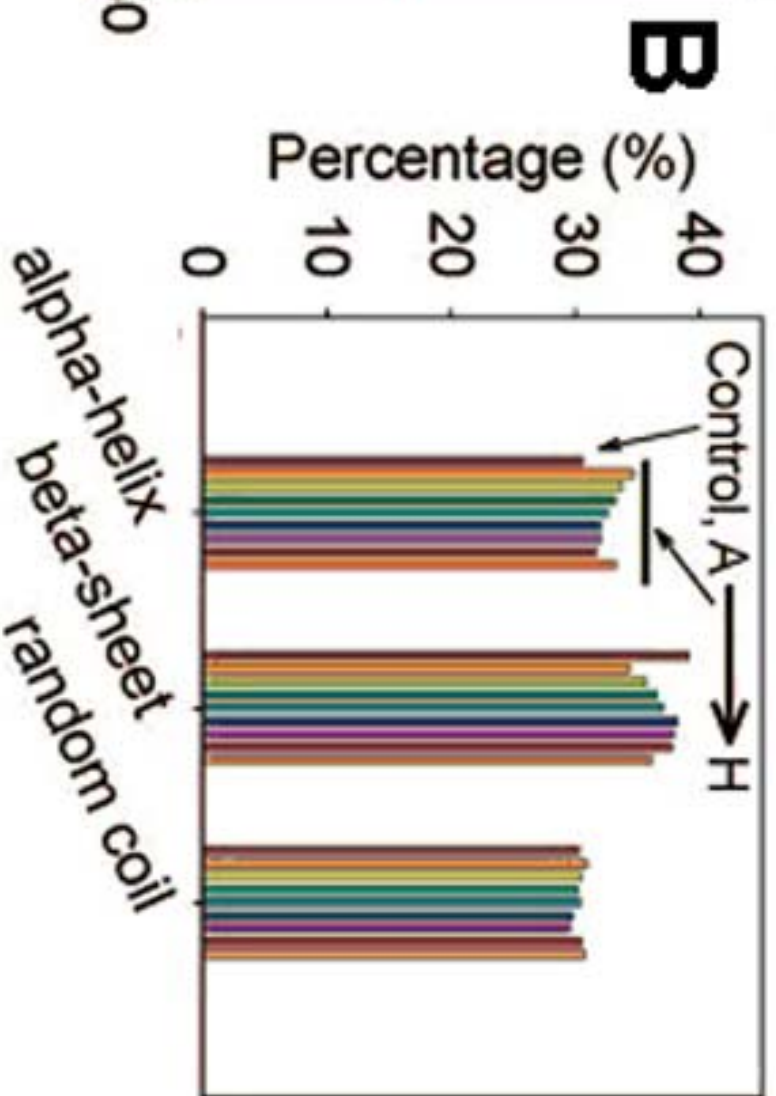

**A**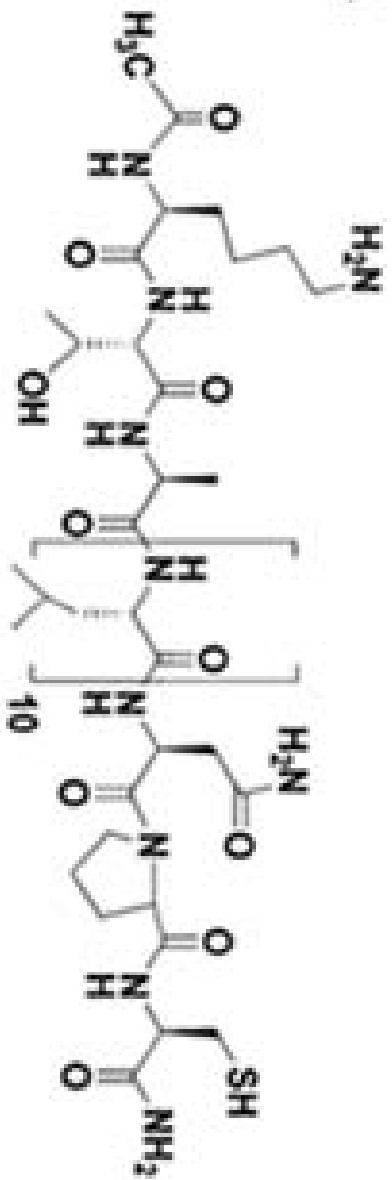**B**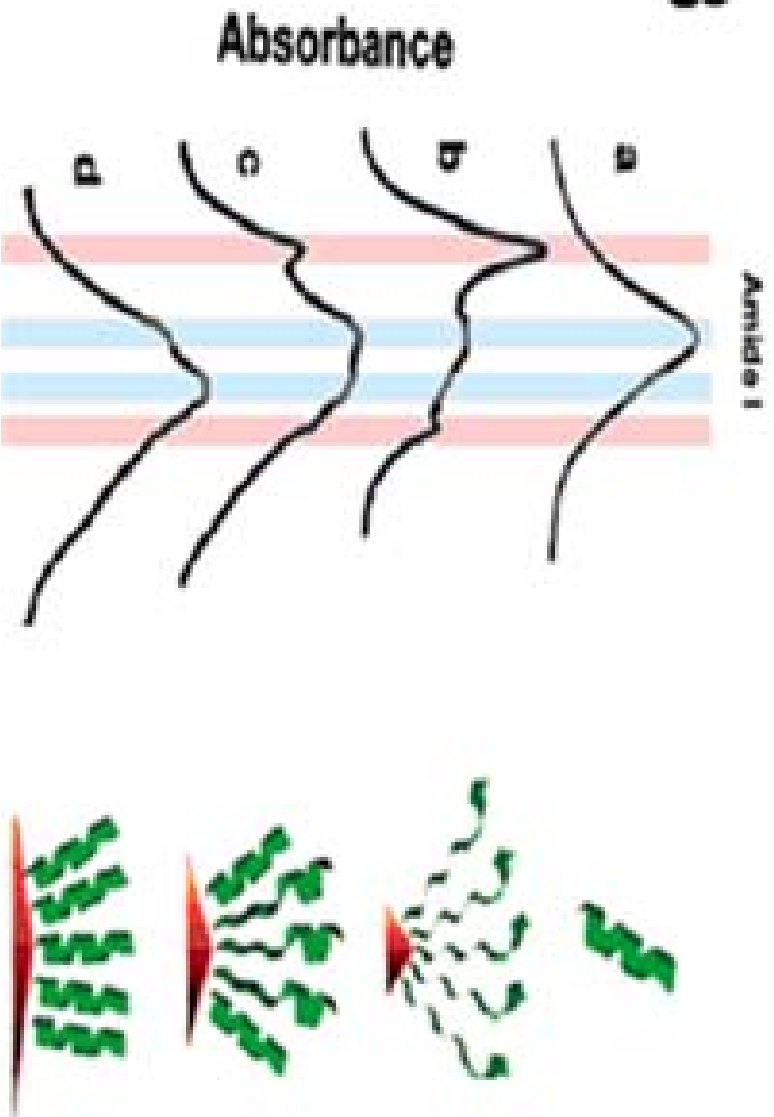

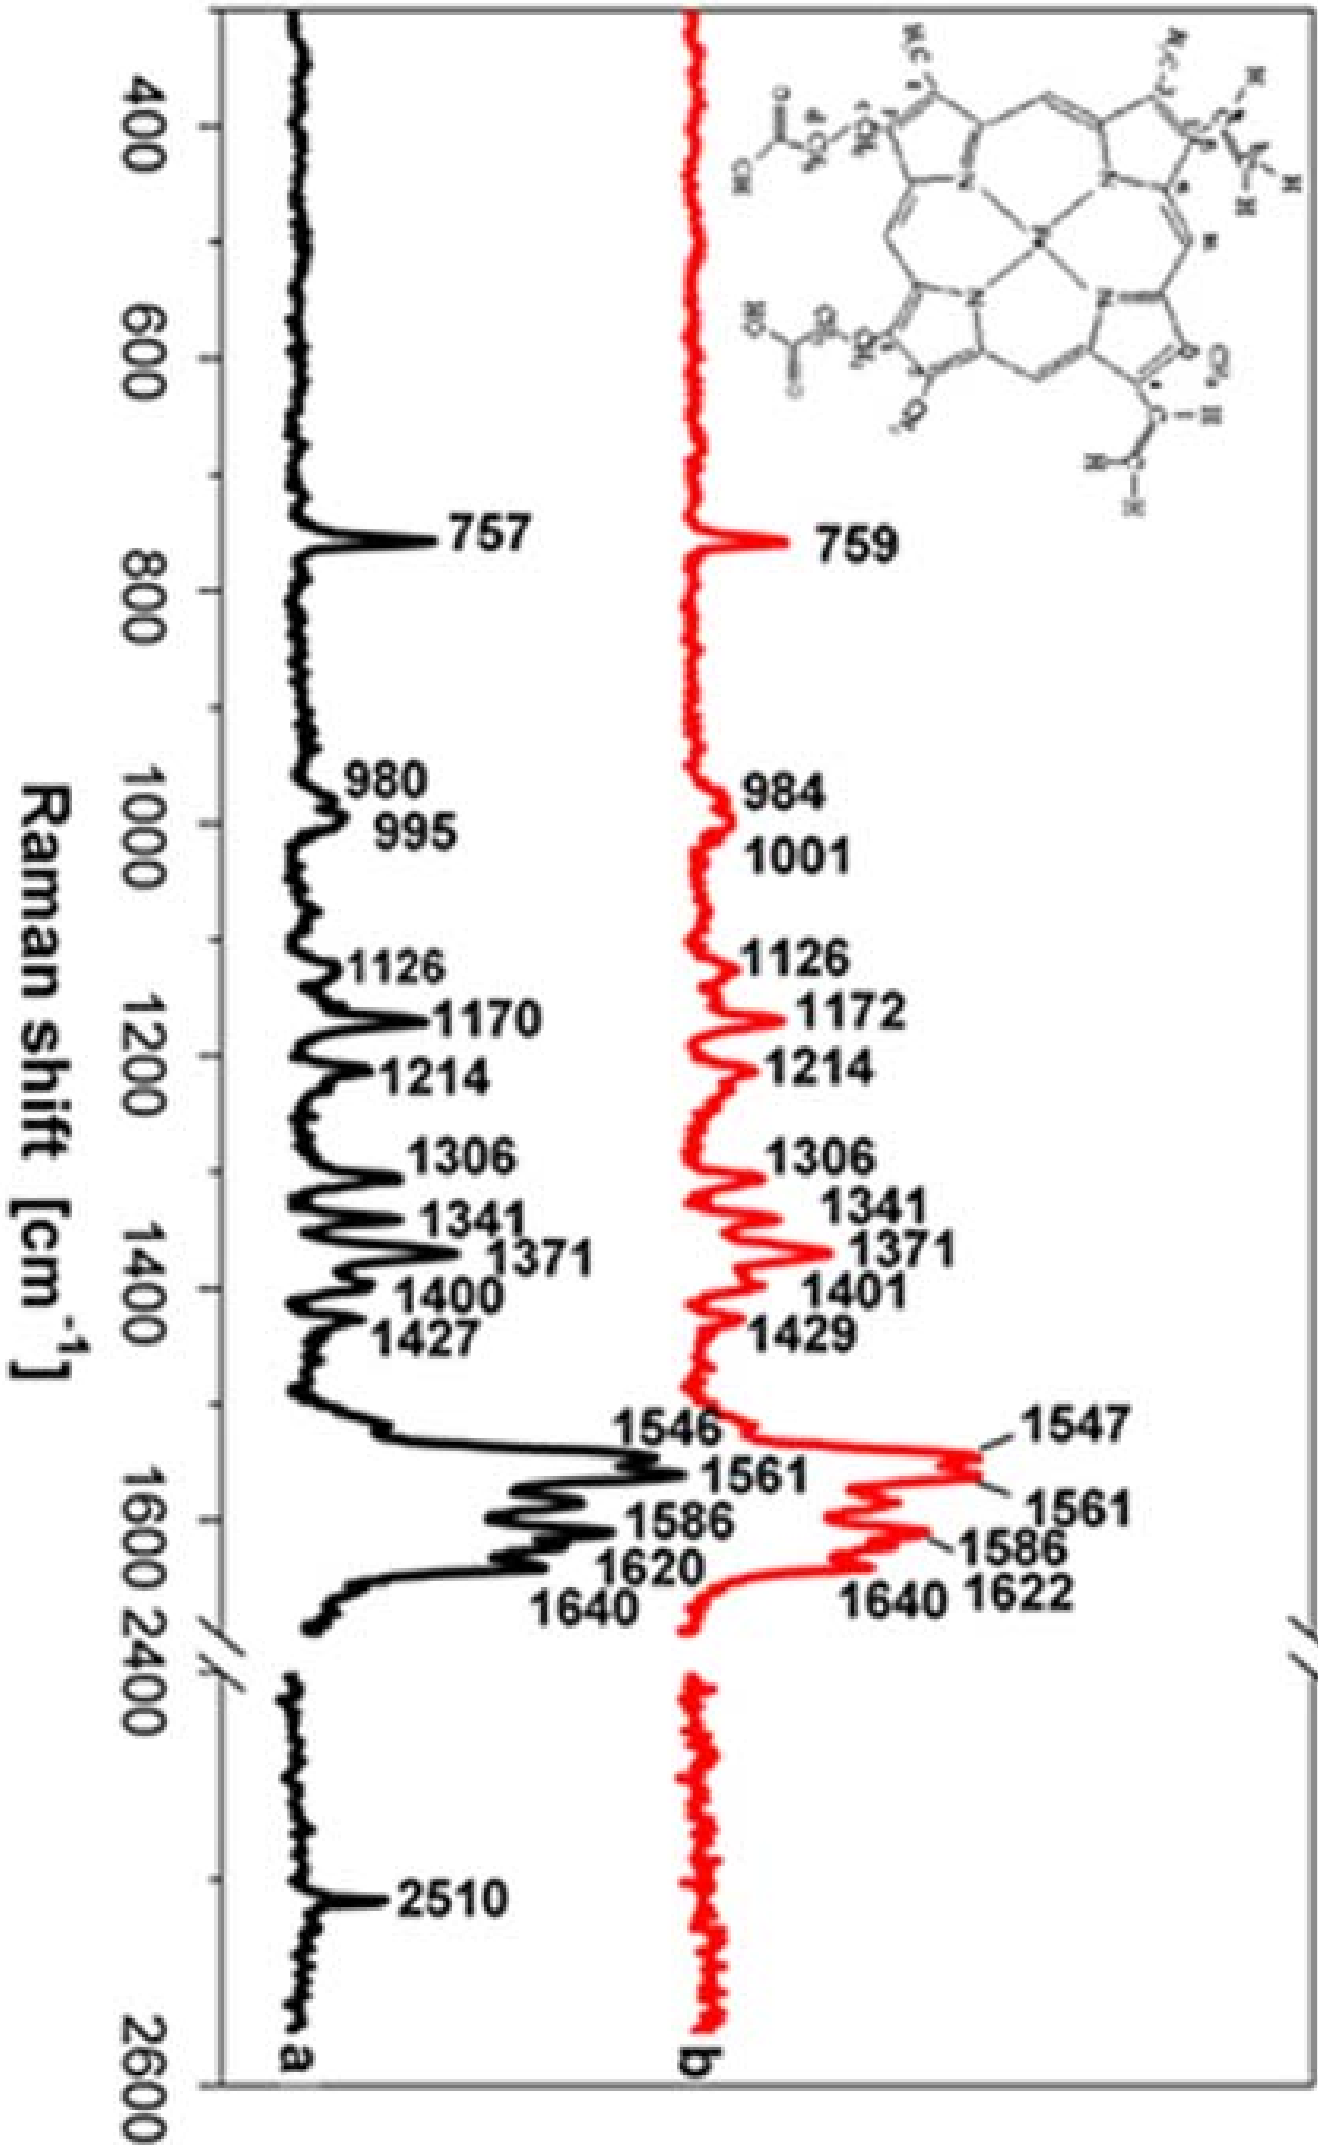

**A**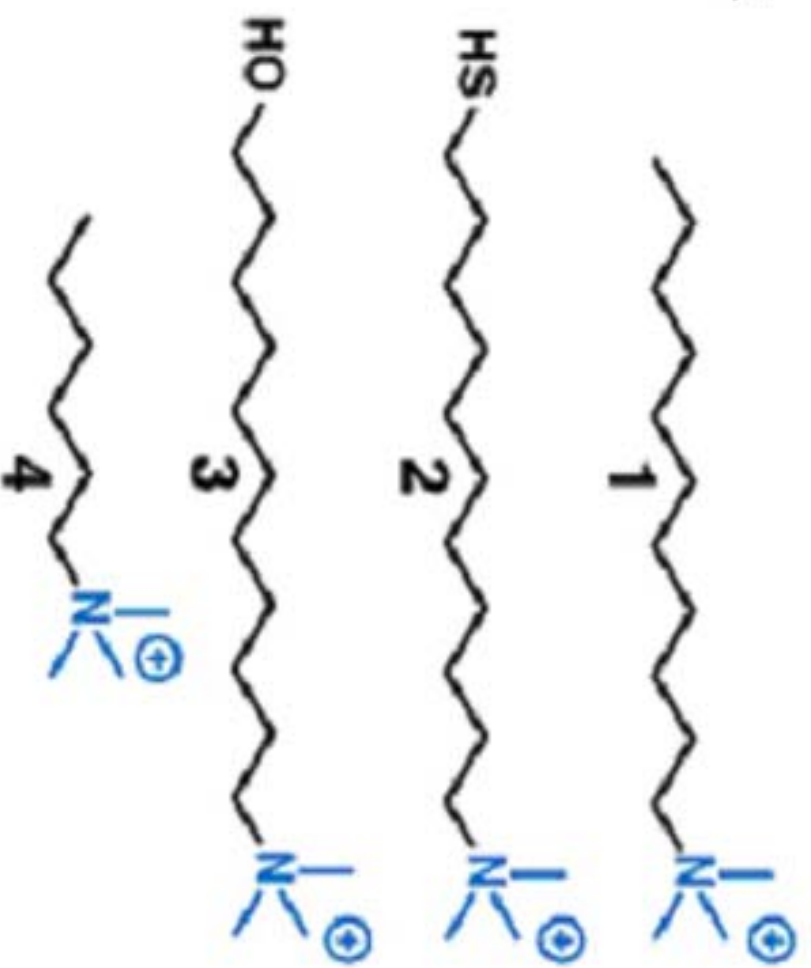**B**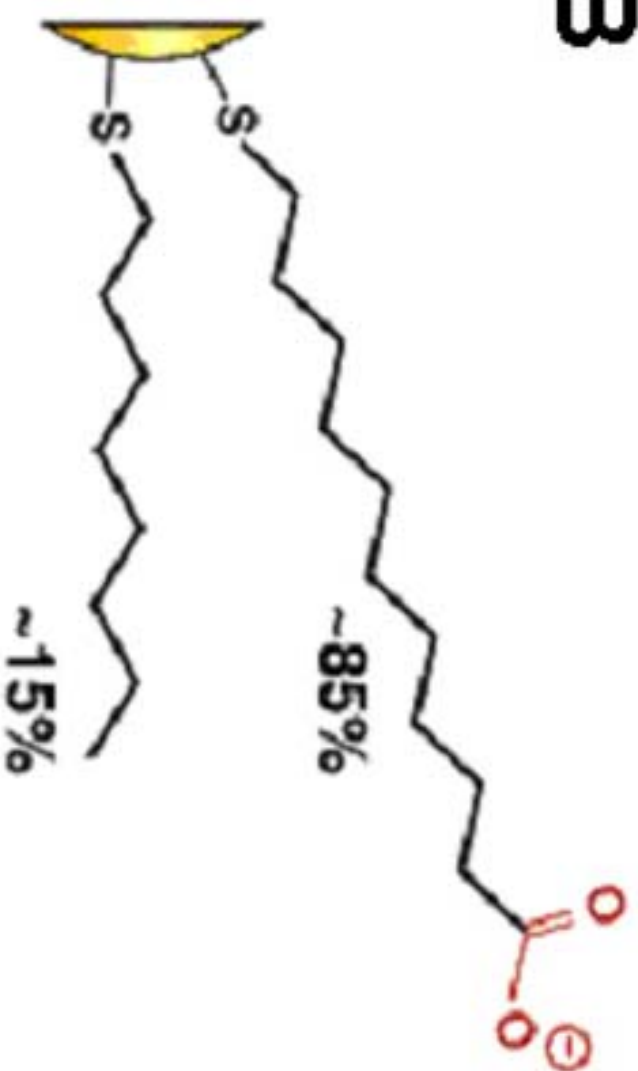**AuCOOH**



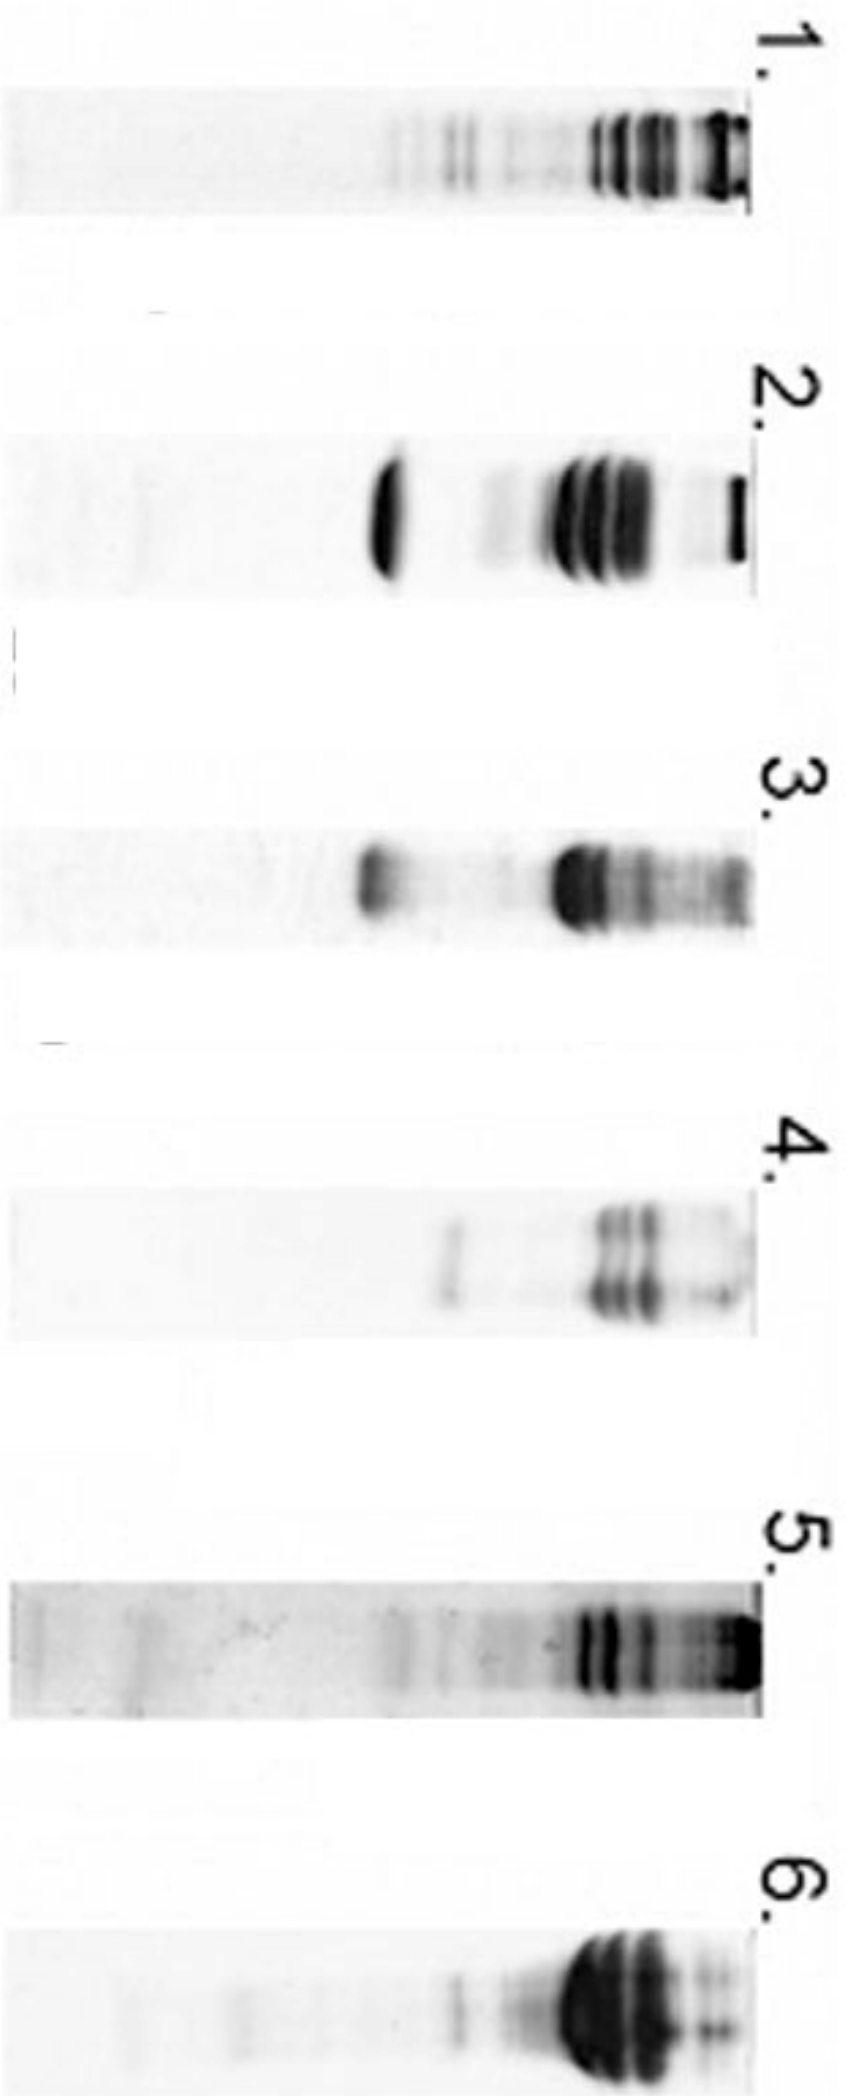

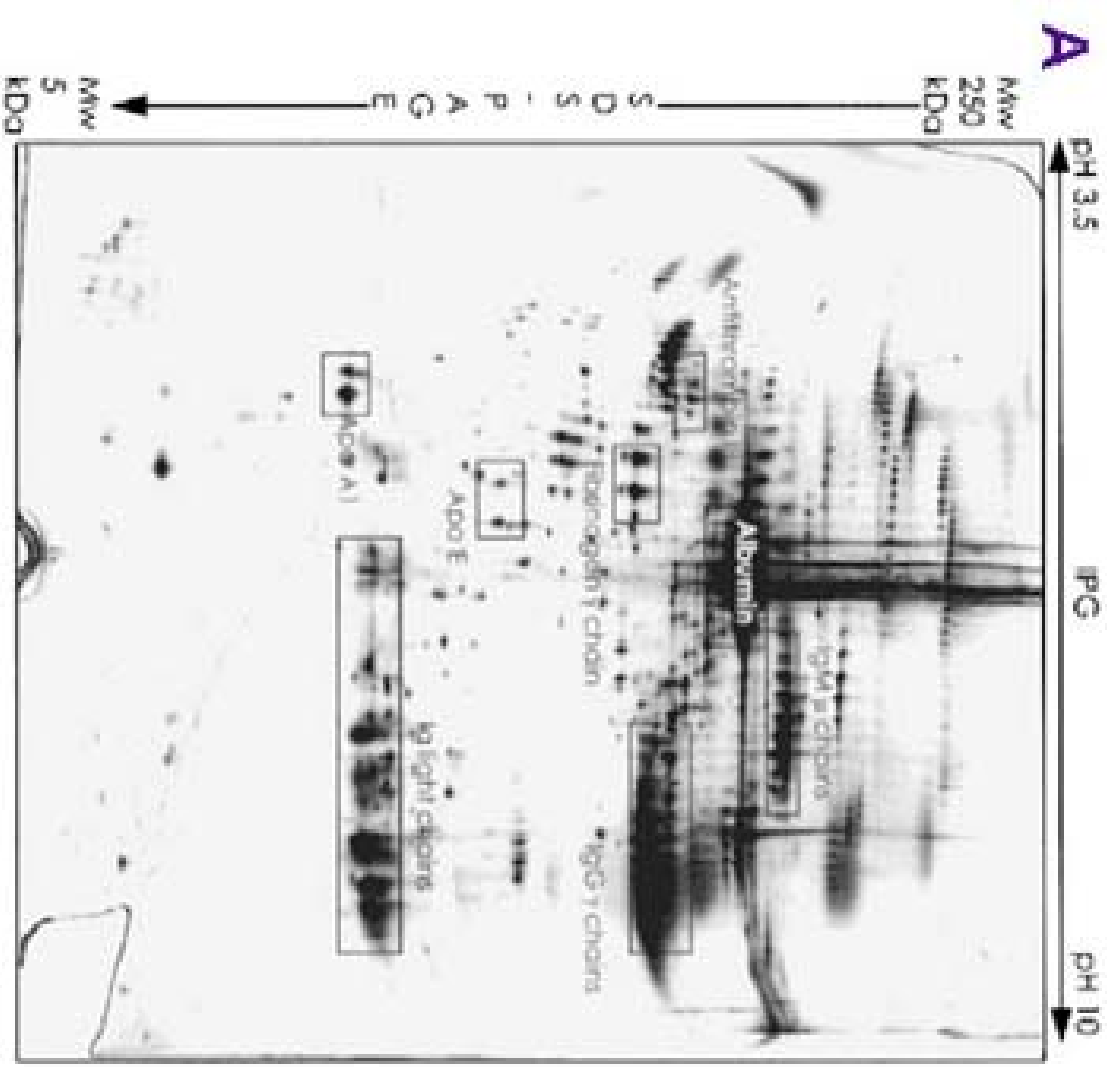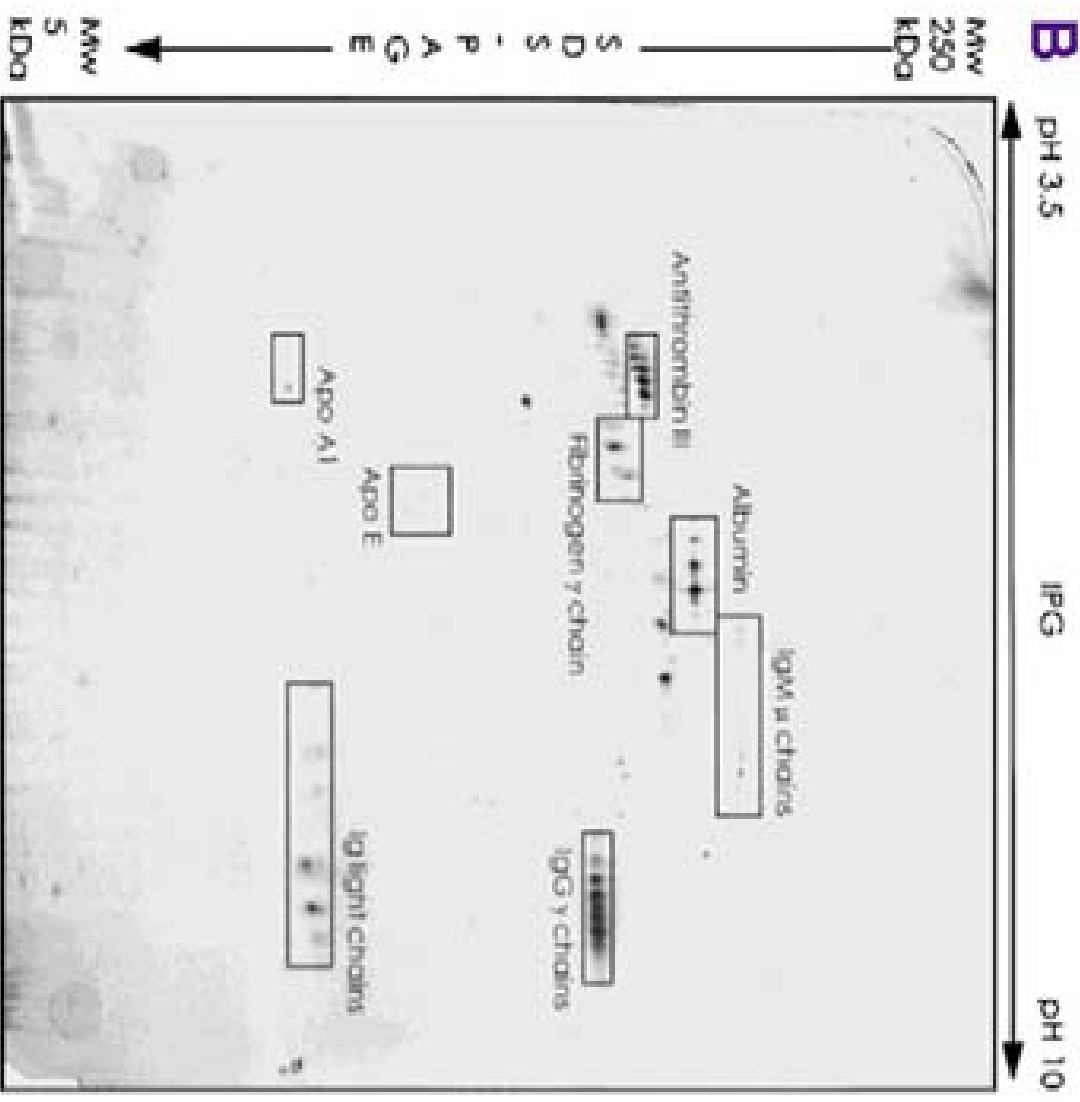

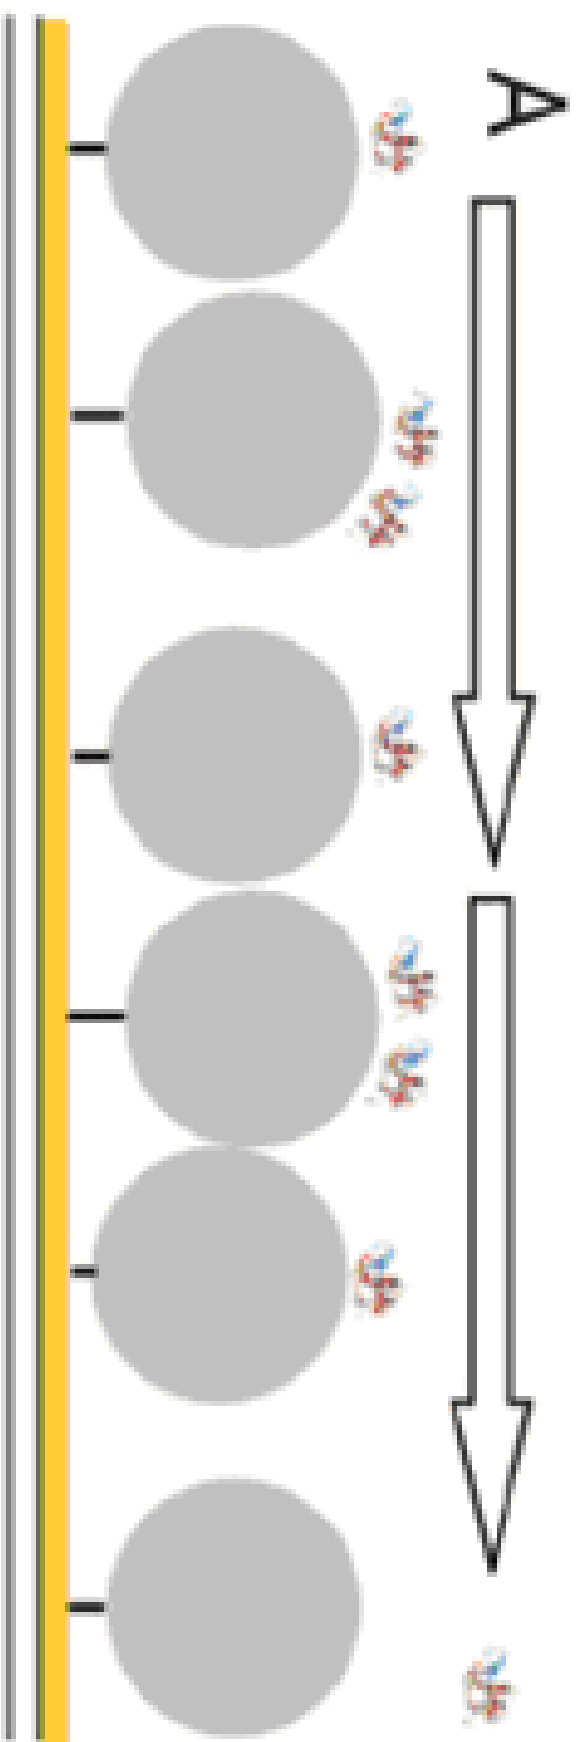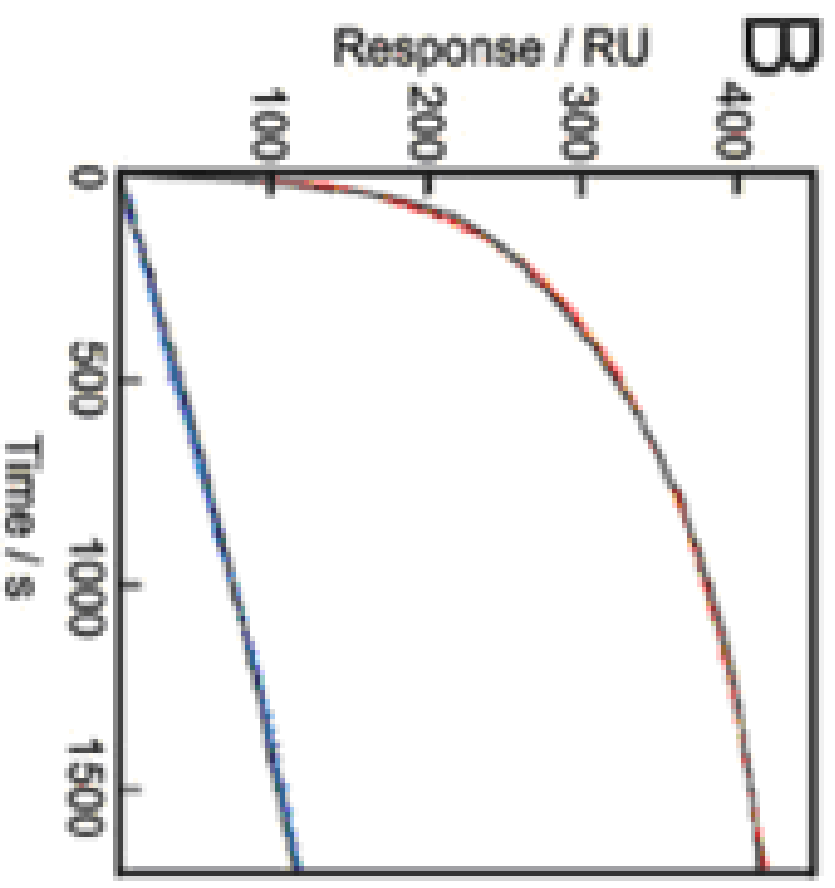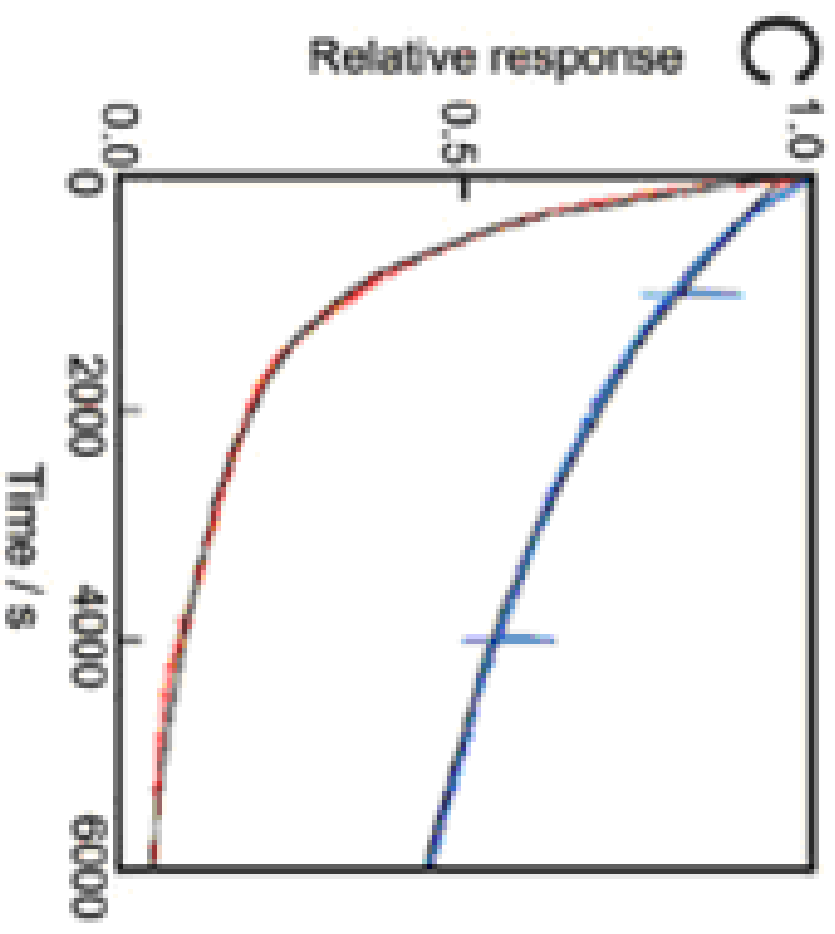

Supplement: NIHMS740063-supplement-Supplementary_Information.pdf [file NIHMS740063-supplement-Supplementary_Information.pdf]
